# Supplementary material
Source: PubMed Central journal article supplement (PMC7721368)
Supplement: NIHMS1650494-supplement-supplemental_data.pdf [file NIHMS1650494-supplement-supplemental_data.pdf]

## Supporting Information

Human 15-lipoxygenase-2 role in the biosynthesis of the lipoxin intermediate, 5S,15S-diHpETE, implicated with altered positional specificity of human 15-lipoxygenase-1

**Steven C. Perry<sup>1</sup>, Thomas Horn<sup>1%</sup>, Benjamin E. Tourdot<sup>2</sup>, Adriana Yamaguchi<sup>2</sup>, Chakrapani Kalyanaraman<sup>3</sup>, William S. Conrad<sup>1</sup>, Oluwayomi Akinkugbe<sup>1</sup>, Michael Holinstat<sup>2</sup>, Matthew P. Jacobson<sup>3</sup>, Theodore R. Holman<sup>1\*</sup>**

<sup>1</sup>Department of Chemistry and Biochemistry, University of California Santa Cruz, Santa Cruz, CA 95064, United States

<sup>2</sup>Department of Pharmacology, University of Michigan Medical School, Ann Arbor, MI 48109, United States

<sup>3</sup>Department of Pharmaceutical Chemistry, School of Pharmacy, University of California San Francisco, San Francisco, CA 94158, United States

<sup>%</sup>Current address: Kampstreet 34, 50354 Hürth, North Rhine-Westphalia, Germany

<sup>\*</sup>To whom correspondence should be addressed: Theodore R. Holman, Department of Chemistry and Biochemistry, University of California Santa Cruz, Santa Cruz, CA 95064; holman@ucsc.edu; Tel.: +1(831) 459-5884; fax: +1(831)459-2935

FUNDING: NIH R01 GM105671 (MH and TRH), NIH R01 HL11405 (MH and TRH), NIH R35 GM131835 (MH and TRH) and NIH K99HL136784 (BET).

Disclaimer: MPJ is a consultant to and shareholder of Schrodinger LLC, which licenses the software used in this work.

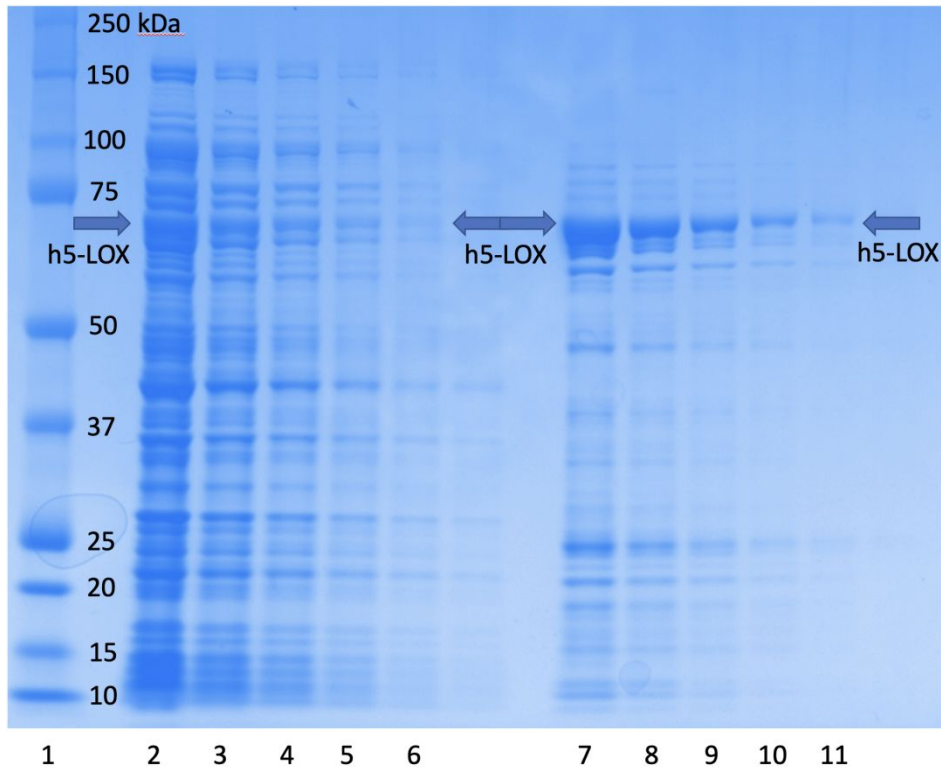

**Figure S1.** SDS-PAGE

Lane 1: Protein standards.

Lane 2: 380 ugs total protein ammonium sulfate h5-LOX fraction.

Lane 3: 190 ugs total protein ammonium sulfate h5-LOX fraction.

Lane 4: 95 ugs total protein ammonium sulfate h5-LOX fraction.

Lane 5: 48 ugs total protein ammonium sulfate h5-LOX fraction.

Lane 6: 24 ugs total protein ammonium sulfate h5-LOX fraction.

Lane 7: 5 ugs Hig-tag purified Stable h5-LOX.

Lane 8: 2.5 ugs Hig-tag purified Stable h5-LOX.

Lane 9: 1.3 ugs Hig-tag purified Stable h5-LOX.

Lane 10: 0.61 ugs Hig-tag purified Stable h5-LOX.

The h5-LOX protein band is indicated on the SDS-PAGE. Measuring band density with ImageJ software, h5-LOX was estimated to be approximately 1% of the total protein based on a Stable h5-LOX standard. From this estimation, the kinetic parameters were calculated. It should also be emphasized that we assumed that 100% of the h5-LOX was loaded with iron, therefore, the estimation of active h5-LOX concentration could be lower.

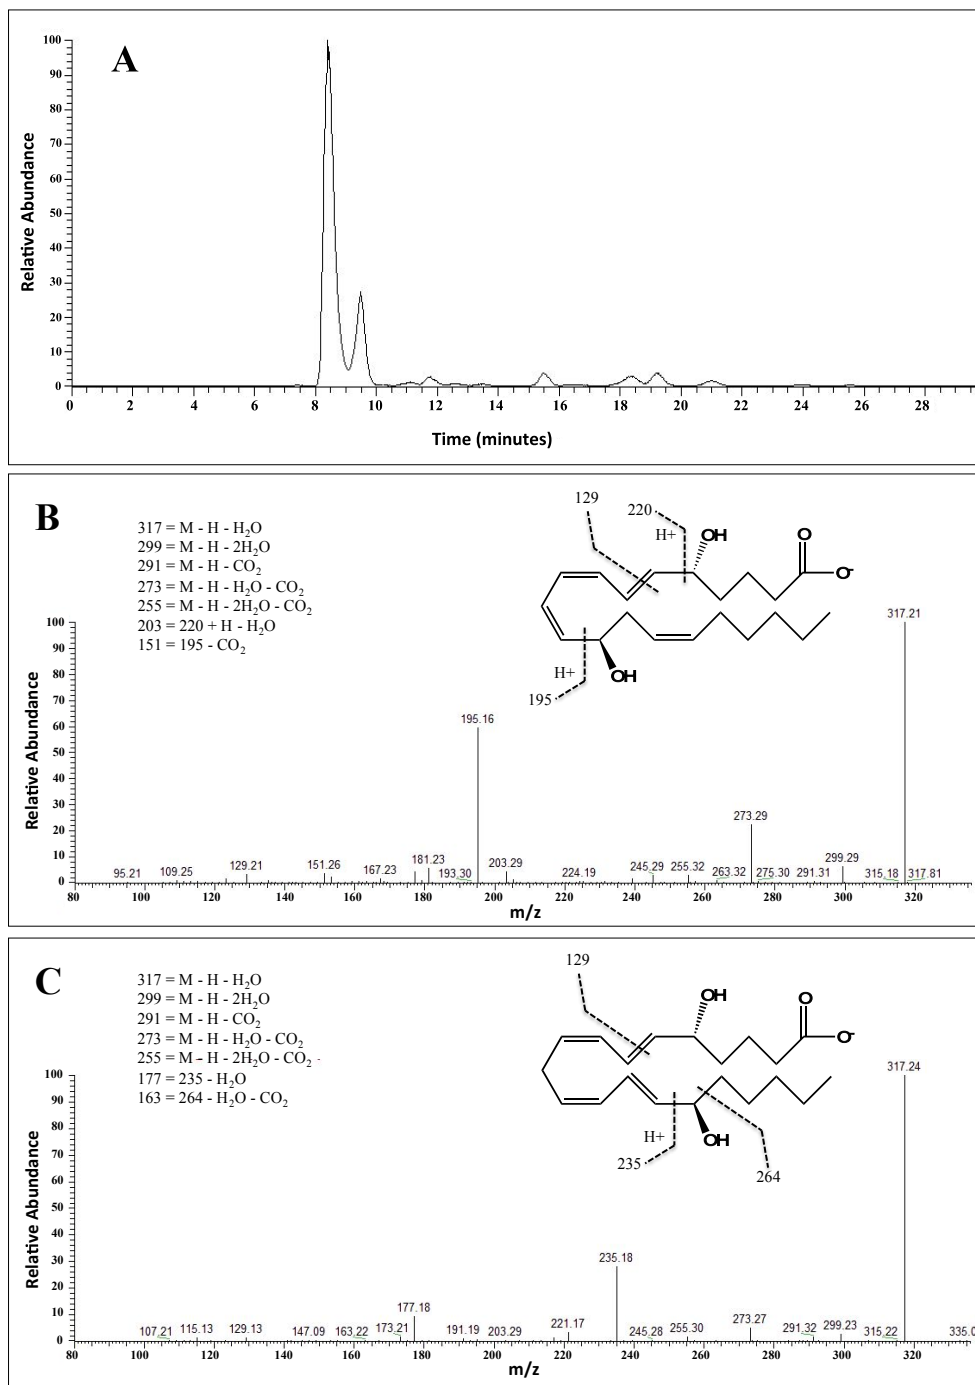

**Figure S2.** h15-LOX-1 primarily synthesizes 5S,12S-diHETE from 5S-HETE. (A) Selected ion chromatogram at m/z of 335. Larger peak at 8.5 min is 5S,12S-diHETE. Smaller peak at 9.5 min is 5S,15S-diHETE. (B) MS/MS spectra of 5S,15S-diHETE prepared from reaction of h15-LOX-1 with 5S-HETE. (C) MS/MS spectra of 5S,15S-diHETE prepared from reaction of h15-LOX-1 with 5S-HETE. Samples were reduced to form the di-alcohol products

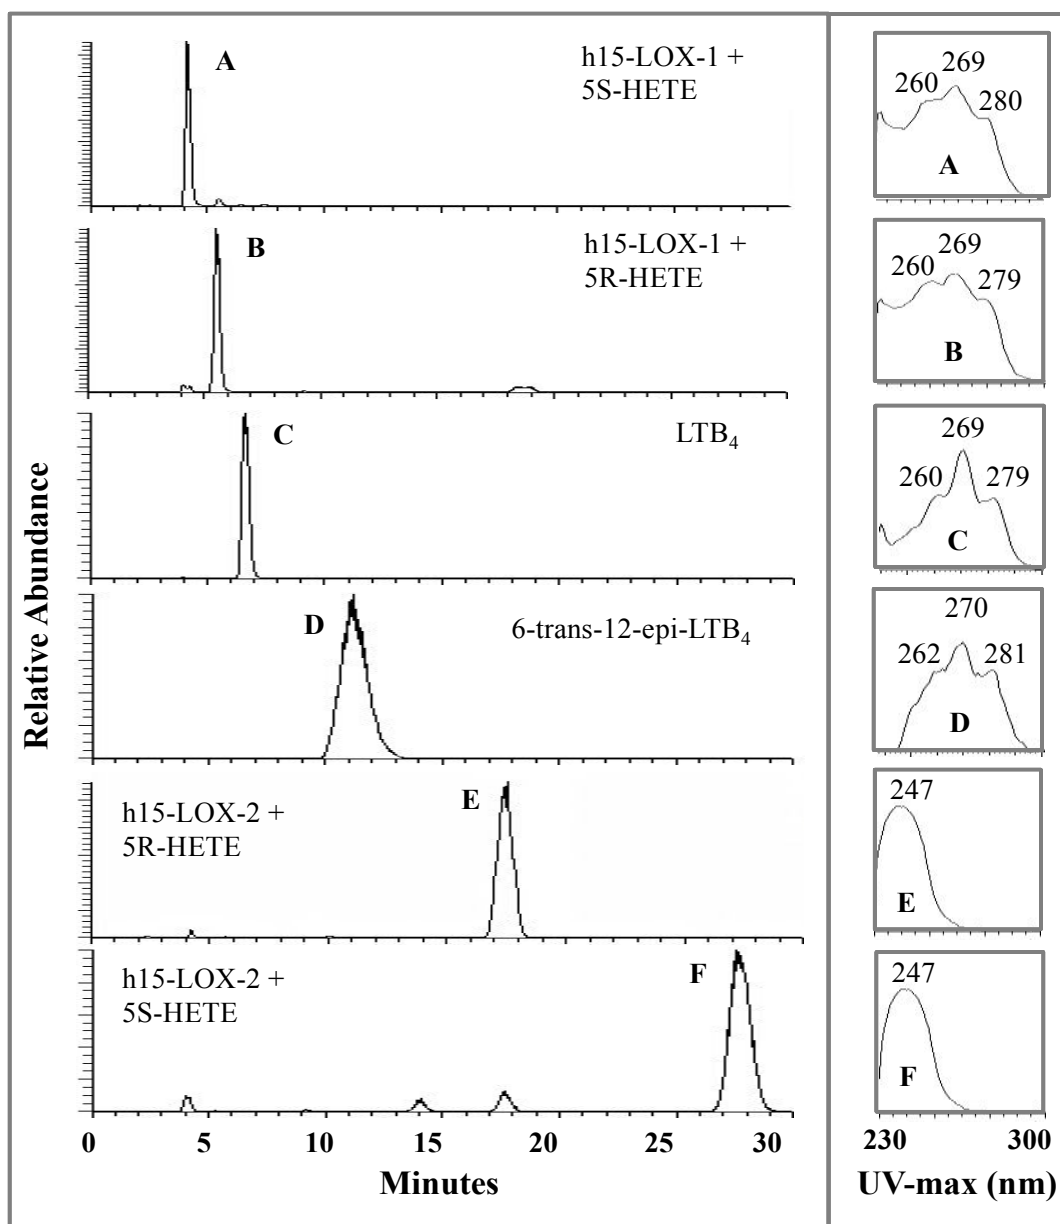

**Figure S3.** Chiral chromatograms and UV-maxima of 5,12-diHETE and 5,15-diHETE isomers. The products formed by h15-LOX-1 and h15-LOX-2 from 5S-HETE and 5R-HETE were analyzed using Chiral LC-MS/MS and UV-vis spectroscopy and compared to LTB<sub>4</sub> and 6-trans-7-epi-LTB<sub>4</sub> standards. All 5,12-diHETE isomers contained a central peak at ~270 nm, flanked by shoulders at ~260 nm and ~280 nm, consistent with the presence of a conjugated triene. Shoulders of equal intensity at 281 nm and 261 nm are indicative of an EEZ configuration, while a more intense shoulder at 260 nm compared to 280 nm indicates the EZE configuration. 5,15-diHETE isomers contain two conjugated dienes separated by a methylene, indicated by a UV-maxima of 247 nm.

| compound                                          | stereochemistry          | source             | RT       |
|---------------------------------------------------|--------------------------|--------------------|----------|
| 5S,15S-diHETE                                     | 5(S),15(S)-6E,8Z,11Z,13E | standard           | 27.5 min |
|                                                   | 5(S),15(S)-6E,8Z,11Z,13E | h5-LOX +15S-HETE   | 27.2 min |
|                                                   | 5(S),15(S)-6E,8Z,11Z,13E | h12-LOX + 5S-HETE  | 27.9 min |
|                                                   | 5(S),15(S)-6E,8Z,11Z,13E | h15-LOX-1+ 5S-HETE | 27.9 min |
|                                                   | 5(S),15(S)-6E,8Z,11Z,13E | h15-LOX-2+ 5S-HETE | 27.8 min |
| 5R,15S-diHETE                                     | 5(R),15(S)-6E,8Z,11Z,13E | h15-LOX-2+ 5R-HETE | 17.5 min |
| 6- <i>trans</i> -12- <i>epi</i> -LTB <sub>4</sub> | 5(S),12(S)-6E,8E,10E,14Z | standard           | 11.6 min |
| LTB <sub>4</sub>                                  | 5(S),12(R)-6Z,8E,10E,14Z | standard           | 6.6 min  |
| 5R,12S-diHETE                                     | 5(R),12(S)-6E,8Z,10E,14Z | h15-LOX-1+ 5R-HETE | 5.5 min  |
| 5S,12S-diHETE                                     | 5(S),12(S)-6E,8Z,10E,14Z | standard           | 4.2 min  |
|                                                   | 5(S),12(S)-6E,8Z,10E,14Z | h5-LOX +12S-HETE   | 4.2 min  |
|                                                   | 5(S),12(S)-6E,8Z,10E,14Z | h12-LOX + 5S-HETE  | 4.3 min  |
|                                                   | 5(S),12(S)-6E,8Z,10E,14Z | h15-LOX-1+ 5S-HETE | 4.2 min  |

**Figure S4.** 5,15-diHETE and 5,12-diHETE isomers produced through different LOX pathways were compared to 5S,15S-diHETE, 5S,12S-diHETE, LTB<sub>4</sub> and 6-*trans*-12-*epi*-LTB<sub>4</sub> standards using LC-MS/MS with a reverse-phase chiral column.
